# Supplementary material
Source: PubMed Central journal article supplement (PMC4500543)
Supplement: NIHMS697529-supplement-Supplement.pdf [file NIHMS697529-supplement-Supplement.pdf]

1 **Appendix A: Comprehensive Author Relationships With Industry and other entities—**  
 2 **ACC/AHA/AACVPR/AAFP/ANA The Concepts for Clinician–Patient Shared Accountability in**  
 3 **Performance Measures**

| Name                        | Employment                                                                                | Consultant                                                                                                                                                                                                                        | Speaker | Ownership/<br>Partnership/<br>Principal | Research                                                                                                                                                     | Institutional,<br>Organizational, or<br>Other Financial<br>Benefit                                                                                                                                                                                                                                                                                                               | Expert<br>Witness |
|-----------------------------|-------------------------------------------------------------------------------------------|-----------------------------------------------------------------------------------------------------------------------------------------------------------------------------------------------------------------------------------|---------|-----------------------------------------|--------------------------------------------------------------------------------------------------------------------------------------------------------------|----------------------------------------------------------------------------------------------------------------------------------------------------------------------------------------------------------------------------------------------------------------------------------------------------------------------------------------------------------------------------------|-------------------|
| Eric. D. Peterson,<br>Chair | Executive Director,<br>Duke Clinical<br>Research Institute                                | <ul style="list-style-type: none"> <li>• Boehringer Ingelheim</li> <li>• Genentech</li> <li>• Janssen<br/>Pharmaceuticals</li> <li>• Johnson &amp; Johnson</li> <li>• Merck</li> </ul>                                            | None    | None                                    | <ul style="list-style-type: none"> <li>• Eli Lilly†</li> <li>• Johnson &amp; Johnson†</li> <li>• Janssen<br/>Pharmaceuticals†</li> </ul>                     | <ul style="list-style-type: none"> <li>• DCRI‡</li> </ul>                                                                                                                                                                                                                                                                                                                        | None              |
| Mary Barton                 | National Committee<br>for Quality Assurance,<br>Vice President                            | None                                                                                                                                                                                                                              | None    | None                                    | None                                                                                                                                                         | <ul style="list-style-type: none"> <li>• Kaiser (Spouse) †</li> <li>• National Committee<br/>for Quality Assurance†</li> </ul>                                                                                                                                                                                                                                                   | None              |
| Craig Beam                  | Medical Development<br>Specialists—Senior<br>Vice President                               | None                                                                                                                                                                                                                              | None    | None                                    | None                                                                                                                                                         | None                                                                                                                                                                                                                                                                                                                                                                             | None              |
| L. Hayley Burgess           | HCA Clinical Services<br>Group—Director of<br>Medication Safety and<br>System Innovations | None                                                                                                                                                                                                                              | None    | None                                    | None                                                                                                                                                         | None                                                                                                                                                                                                                                                                                                                                                                             | None              |
| Donald E. Casey,<br>Jr.     | Atlantic Health—<br>Chief Medical Officer                                                 | None                                                                                                                                                                                                                              | None    | None                                    | None                                                                                                                                                         | None                                                                                                                                                                                                                                                                                                                                                                             | None              |
| Joseph P. Drozda,<br>Jr.    | Mercy Health—<br>Director, Outcomes<br>Research                                           | None                                                                                                                                                                                                                              | None    | None                                    | <ul style="list-style-type: none"> <li>• FDA/Harvard<br/>University: Principal<br/>Investigator †</li> </ul>                                                 | <ul style="list-style-type: none"> <li>• Boston Scientific<br/>Rhythm Management<br/>(son) †</li> <li>• AMA-PCPI Executive<br/>Committee *</li> </ul>                                                                                                                                                                                                                            | None              |
| Gregg C. Fonarow            | Ahmanson-UCLA<br>Cardiomyopathy<br>Center—Director,<br>Division of<br>Cardiology          | <ul style="list-style-type: none"> <li>• Amgen</li> <li>• Bayer</li> <li>• Boston Scientific</li> <li>• Johnson &amp; Johnson</li> <li>• Medicines Company</li> <li>• Medtronic</li> <li>• Novartis†</li> <li>• Takeda</li> </ul> | None    | None                                    | <ul style="list-style-type: none"> <li>• Gambro</li> <li>• Medtronic</li> <li>• NHLBI†</li> <li>• NIH/NIAID†</li> <li>• Novartis†</li> <li>• PRT*</li> </ul> | <ul style="list-style-type: none"> <li>• ACC/AHA Task Force<br/>on Data Standards*</li> <li>• ACTION Registry<br/>GWTG Steering<br/>Committee Chair*</li> <li>• AHA Manuscript<br/>oversight committee*</li> <li>• ACC/AHA Task Force<br/>on Performance<br/>Measures *</li> <li>• AHA Consumer Health<br/>Quality Coordinating<br/>Committee *</li> <li>• IMPROVE HF</li> </ul> | None              |

|                      |                                                                                            |                                |      |      |                                                                      | Steering Committee*                                                |                                                            |
|----------------------|--------------------------------------------------------------------------------------------|--------------------------------|------|------|----------------------------------------------------------------------|--------------------------------------------------------------------|------------------------------------------------------------|
| David Goff, Jr.      | Wake Forest University—Professor of Medicine                                               | None                           | None | None | None                                                                 | • Denver Metro AHA *<br>• Dean, Colorado School of Public Health † | None                                                       |
| Kathleen L. Grady    | Blumh Cardiovascular Institute—Administrative Director, Center for Heart Failure           | None                           | None | None | • AHA †<br>• NHLBI                                                   | • AHA*                                                             | None                                                       |
| P. Michael Ho        | Stanford University School of Medicine—Professor of Medicine                               | • Wellpoint, Inc..             | None | None | None                                                                 | None                                                               | None                                                       |
| Dana King            | Medical University of South Carolina—Professor & Vice Chair, Department of Family Medicine | • Pfizer/ Beohringer Ingelheim | None | None | None                                                                 | None                                                               | None                                                       |
| Marjorie L. King     | Columbia University (Helen Hayes Hospital)—Director, Cardiac Rehabilitation                | None                           | None | None | None                                                                 | None                                                               | None                                                       |
| Frederick A. Masoudi | University of Colorado at Denver—Associate Professor of Medicine, Division of Cardiology   | None                           | None | None | • AHRQ †<br>• NHLBI †<br>• Oklahoma Foundation for Medical Quality † | • ACC †<br>• AHA<br>• Massachusetts Medical Society                | • Plaintiff: 2012 Acute Coronary Syndrome, Expert Opinion. |
| David R. Nielsen     | The American Academy of Otolaryngology—Chief Executive Officer & Executive Vice President  | None                           | None | None | None                                                                 | • AAO †<br>• CMSS*<br>• AMA-PCPI*                                  | None                                                       |
| Stephen Stanko       | Mended Hearts—Chair, Catherization Patient Outreach                                        | None                           | None | None | None                                                                 | None                                                               | None                                                       |

1  
2 This table represents all relationships of committee members with industry and other entities that were reported by authors, including those not deemed to be relevant to this  
3 document, at the time this document was under development. A person is deemed to have a *significant* interest in a business if the interest represents ownership of 5% or more of  
4 the voting stock or share of the business entity, or ownership of \$10 000 or more of the fair market value of the business entity; or if funds received by the person from the business  
5 entity exceed 5% of the person’s gross income for the previous year. A relationship is considered to be *modest* if it is less than significant under the preceding definition.  
6 Relationships that exist with no financial benefit are also included for the purposes of transparency. Relationships in this table are modest unless otherwise noted.

7 \*No financial relationship †Significant (greater than \$10 000) relationship.

8  
9  
10 AAO indicate American Academy of Otolaryngology; AACVPR indicates American Association of Cardiovascular and Pulmonary Rehabilitation; AAFP, American Academy of  
11 Family Physicians; ACC, American College of Cardiology; ACTION-GWTG; ACTION Get with the Guidelines; AHA, American Heart Association, AHRQ, Agency for  
12 Healthcare Research and Quality; AMA-PCPI, American Medical Association—Physician Consortium for Performance Improvement; ANA, American Nurses Association;

Peterson et al.

Clinician-Patient Shared Accountability in Performance Measures

© 2014 by the American College of Cardiology Foundation and the American Heart Association, Inc.

1 ASHP, American Society of Health-System Pharmacists; CMSS, Council of Medical Specialty Societies; DCRI, Duke Clinical Research Institute; HCA, Hospital Corporation of  
2 America; IMPROVE HF, Improve the Use of Evidence-Based Heart Failure Therapies in the Outpatient Setting; NHLBI, National Heart, Lung and Blood Institute; NIAID,  
3 National Institute of Allergy and Infectious Diseases; NIH, National Institutes of Health; and PRT, Pharmaceutical Roundtable; UCLA, University of California, Los Angeles.  
4

5 ‡DCRI has numerous grants and contracts sponsored by industry. These include the following: Aastrom Biosciences†; Abbott†; Abiomed†; Acom Cardiovascular†; Adolor  
6 Corp.†; Advanced Cardiovascular Systems†; Advanced Stent Technologies†; Adynnx; Aijnomoto†; Allergan†; Amgen†; Alnylam Pharma†; Alpharma†; Amylin  
7 Pharmaceuticals†; Anadyst†; Anesiva†; Angel Medical Systems†; ANGES MG†; Angiomedrix†; APT Nidus Center†; ASCA Biopharma†; Astellas Pharma†; Asklepios†;  
8 AstraZeneca†; Atritech†; Attention Therapeutics†; Aventis†; Baxter†; Bayer†; Berlex†; BG Medicine†; Biogen†; Biorex Therapeutics†; Biomarker Factory†; Biosite†; Boehringer  
9 Ingelheim Biogen†; Boston Scientific†; Bristol-Myers Squibb†; BMS Pfizer†; Carbomed†; CardioDx†; CardioKinetix†; Cardiovascular Systems†; Cardiovox†; Celsion Corp.†;  
10 Centocor†; Cerexa†; Chase Medical†; Conatus Pharmaceuticals†; Conor Medsystems†; Cortex†; Corgentech†; CSL Behring†; CV Therapeutics†; Daiichi Pharmaceuticals†;  
11 Daiichi-Sankyo†; Daiichi-Sankyo Lilly†; Datascope; Dendreon†; Dainippon†; Dr. Reddy's Laboratories; Eclipse Surgical Technologies†; Edwards Lifesciences†; Eisai†;  
12 Endicor†; EnteroMedics†; Enzon Pharmaceuticals†; Eli Lilly†; Ethicon†; Ev3†; Evalve†; F2G†; Flow Cardia†; Fox Hollow Pharmaceuticals†; Fujisawa†; Genetech†; General  
13 Electric†; General Electric Co.†; General Electric Healthcare†; General Electric Medical Systems†; Genzyme Corp.†; Genome Canada†; Gilead Sciences†; GlaxoSmithKline†;  
14 Guidant Corp.†; HeartScape Technologies†; Hoffman-LaRoche†; Hospira†; Idera Pharmaceuticals†; Ikaria†; Imcor Pharmaceuticals†; Immunex†; INFORMD†; Inimex†; Inspire  
15 Pharmaceuticals†; Ischemix†; Janssen†; Johnson and Johnson†; Jomed†; Juventus Therapeutics†; KAI Pharmaceuticals†; King Pharmaceuticals†; Kyowa Pharma†; Luitpold†;  
16 Mardil†; MedImmune†; Medscape†; Medtronic Diabetes†; Medtronic†; Medtronic Vascular†; Merck Group†; MicroMed Technology†; Millennium Pharmaceuticals†; Mitsubishi  
17 Tanabe†; Momenta†; Nabriva†; Neuron Pharmaceuticals†; NitroMed; NovaCardia Inc†; Novartis AG Group†; Novartis Pharmaceuticals†; Oncura†; Orexigen†; Ortho-McNeil-  
18 Janssen†; OSI Eyetech†; OSI Pharmaceuticals†; Pfizer†; Pharmacyclics†; Pharmasset†; Pharmsos†; Phyxius Pharmaceuticals; Pharsight†; Pluristen Therapeutics†; Portola  
19 Pharmaceuticals†; Proventys†; Radiant†; Regado Biosciences†; Rengeneron Pharmaceuticals†; Roche Molecular Systems†; Roche Group†; Roche Diagnostic†; Salix  
20 Pharmaceuticals†; Sanofi-Pasteur, Inc; Sanofi-aventis†; Santaris Pharmaceuticals†; Schering-Plough†; Scios†; Siemens†; Southwest Oncology Group†; Spectranetics†; Summit†;  
21 Sunovion Pharmaceuticals†; TAP Pharmaceutical Products†; Tengion†; The Medicines Company†; Theravance†; TherOx†; Tethys Bioscience†; Theregen†; Three Rivers  
22 Pharmaceuticals†; The EMMES Corporation†; UCB†; Valentis†; Valleylab†; Vertex†; Viacor† and Wyeth†.

23

## Appendix B: Comprehensive Reviewer Relationships With Industry and other entities – ACC/AHA/AACVPR/AAFP/ANA The Concepts for Clinician–Patient Shared Accountability in Performance Measures

| Peer Reviewer             | Representation                                                 | Consultant                                                                           | Speaker           | Ownership/<br>Partnership/<br>Principal | Research                | Institutional,<br>Organizational<br>or Other<br>Financial<br>Benefit                | Expert Witness                                                                                                                                            |
|---------------------------|----------------------------------------------------------------|--------------------------------------------------------------------------------------|-------------------|-----------------------------------------|-------------------------|-------------------------------------------------------------------------------------|-----------------------------------------------------------------------------------------------------------------------------------------------------------|
| Mazen Abu-Fadel           | Content Reviewer- ACC Councils and Sections                    | None                                                                                 | • Abbott Vascular | None                                    | None                    | None                                                                                | None                                                                                                                                                      |
| Cynthia Arslanian-Engoren | Content Reviewer- AHA Committee: CV and Stroke Nursing Council | None                                                                                 | None              | None                                    | None                    | None                                                                                | None                                                                                                                                                      |
| Brian Carlin              | Official Reviewer- AACVPR                                      | •Glaxo Smith Kline, Respiroics, Forest, Breathe Technologies, Boehringer-Ingelheim † | None              | None                                    | None                    | • National Board for Respiratory Care*<br>• National Lung Health Education Program* | None                                                                                                                                                      |
| Lola Coke                 | Official Reviewer- ANA                                         | None                                                                                 | None              | None                                    | None                    | None                                                                                | None                                                                                                                                                      |
| Eileen Collins            | Official Reviewer- AACVPR                                      | None                                                                                 | None              | None                                    | None                    | None                                                                                | None                                                                                                                                                      |
| Silvana Lawrence          | Content Reviewer- ACC Councils and Sections                    | None                                                                                 | None              | None                                    | None                    | None                                                                                | None                                                                                                                                                      |
| Maulik D. Majmudar,       | Content reviewer- ACC Patient-Centered Care Committee          | None                                                                                 | None              | None                                    | None                    | None                                                                                | None                                                                                                                                                      |
| Ariane Marelli            | Content Reviewer- ACC Councils and Sections                    | None                                                                                 | None              | None                                    | None                    | None                                                                                | None                                                                                                                                                      |
| Robert Piana              | Content Reviewer- ACC Councils and Sections                    | •W.L. Gore & Associates, Inc.<br>•HCRI<br>•Axio Research                             | None              | None                                    | • Amplatzer Corporation | • Vasutek                                                                           | • 2012: Third Party Quality Review<br>• 2012: Defendant-Interventional Cardiology<br>• 2011: Defendant CAD Management<br>• 2011 Defendant: Interventional |

Peterson et al.

Clinician-Patient Shared Accountability in Performance Measures

© 2014 by the American College of Cardiology Foundation and the American Heart Association, Inc.

| Peer Reviewer   | Representation                                                                    | Consultant                                       | Speaker | Ownership/<br>Partnership/<br>Principal | Research | Institutional,<br>Organizational<br>or Other<br>Financial<br>Benefit | Expert Witness |
|-----------------|-----------------------------------------------------------------------------------|--------------------------------------------------|---------|-----------------------------------------|----------|----------------------------------------------------------------------|----------------|
|                 |                                                                                   |                                                  |         |                                         |          |                                                                      | Cardiology     |
| Sara Paul       | Content Reviewer- AHA<br>Committee: CV and Stroke Nursing<br>Council              | None                                             | None    | None                                    | None     | • Heart Failure<br>Society of<br>America*                            | None           |
| Susan Pressler  | Content Reviewer- AHA<br>Committee: CV and Stroke Nursing<br>Council              | None                                             | None    | None                                    | None     | • Pfizer*<br>• NIH †                                                 | None           |
| Michael Rich    | Content Reviewer-<br>ACC Councils and Sections                                    | None                                             | None    | None                                    | None     | None                                                                 | None           |
| Barbara Riegel  | Official Reviewer-<br>AHA                                                         | None                                             | None    | None                                    | None     | • NIH<br>• AHA*                                                      | None           |
| William Roach   | Official Reviewer-<br>AHA                                                         | None                                             | None    | None                                    | None     | • AHA*                                                               | None           |
| Darryl Roberts  | Official Reviewer-<br>ANA                                                         | None                                             | None    | None                                    | None     | None                                                                 | None           |
| Joachim Roski   | Official Reviewer-<br>AMA-PCPI                                                    | None                                             | None    | None                                    | None     | None                                                                 | None           |
| Amy Schneider   | Official Reviewer-<br>AAFP                                                        | None                                             | None    | None                                    | None     | None                                                                 | None           |
| Chittur Sivaram | Content Reviewer-<br>ACC Councils and Sections                                    | • Medtronic                                      | None    | None                                    | None     | None                                                                 | None           |
| Karen Walker    | Content Reviewer-<br>ACC Councils and Sections                                    | None                                             | None    | None                                    | None     | None                                                                 | None           |
| Minnow Walsh    | Content Reviewer-<br>ACC CQC Committee and ACC<br>Patient-Centered Care Committee | • Eli Lilly<br>• Novartis<br>• United HealthCare | None    | None                                    | None     | None                                                                 | None           |

This table represents the relevant relationships with industry and other entities that were disclosed at the time of peer review. It does not necessarily reflect relationships with industry at the time of publication. A person is deemed to have a significant interest in a business if the interest represents ownership of 5% or more of the voting stock or share of the business entity, or ownership of \$10 000 or more of the fair market value of the business entity, or if funds received by the person from the business entity exceed 5% of the person's gross income for the previous year. A relationship is considered to be modest if it is less than significant under the preceding definition. Relationships that exist with no financial benefit are also included for the purposes of transparency. Relationships in this table are modest unless otherwise noted.

Peterson et al.

Clinician-Patient Shared Accountability in Performance Measures

© 2014 by the American College of Cardiology Foundation and the American Heart Association, Inc.

AACVPR indicates American Association of Cardiovascular and Pulmonary Rehabilitation; AAFP, American Academy of Family Physicians; ACC, American College of Cardiology; AHA, American Heart Association; AMA-PCPI, American Medical Association–Physician Consortium for Performance Improvement; ANA, American Nurses Association; ASHP, American Society of Health-System Pharmacists; CQC: Clinical Quality Committee; NCQA, National Committee for Quality Assurance; NIH, National Institute of Health.
